# Supplementary material
Source: Springer Nature journal article supplement (https://www.springermedizin.de/resource/supplementary/12984_2012_505_MOESM1_ESM.pdf/9604752)

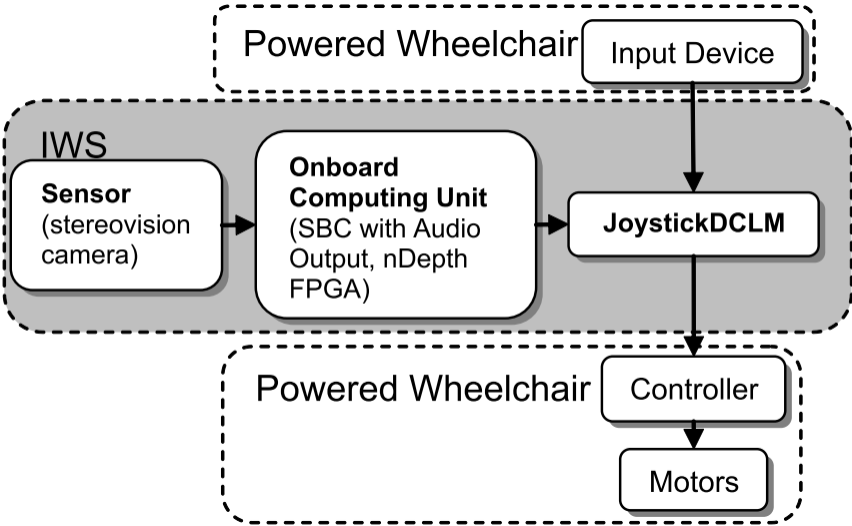

Supplement: MOESM1 [file 9604752]
